# Supplementary material for: Intimate organic–inorganic nanocomposites via rationally designed conjugated polymer-grafted precursors
Source: Royal Society of Chemistry journal article supplement (doi:10.1039/c6nr05451j), 2016-01-01
Supplement: c6nr05451j1.pdf [file c6nr05451j1.pdf]

## Supporting Information

# Intimate Organic–Inorganic Nanocomposites via Rationally Designed Conjugated Polymer-Grafted Precursors

*Jaehan Jung<sup>1,2</sup>, Young Jun Yoon<sup>1</sup>, and Zhiqun Lin<sup>1\*</sup>*

<sup>1</sup>School of Materials Science and Engineering, Georgia Institute of Technology,

Atlanta, Georgia 30332, USA

<sup>2</sup>Department of Materials Science and Engineering, Hongik University,

Sejong 339-701, South Korea

\* To whom the correspondence should be addressed; Email: [zhiqun.lin@mse.gatech.edu](mailto:zhiqun.lin@mse.gatech.edu)

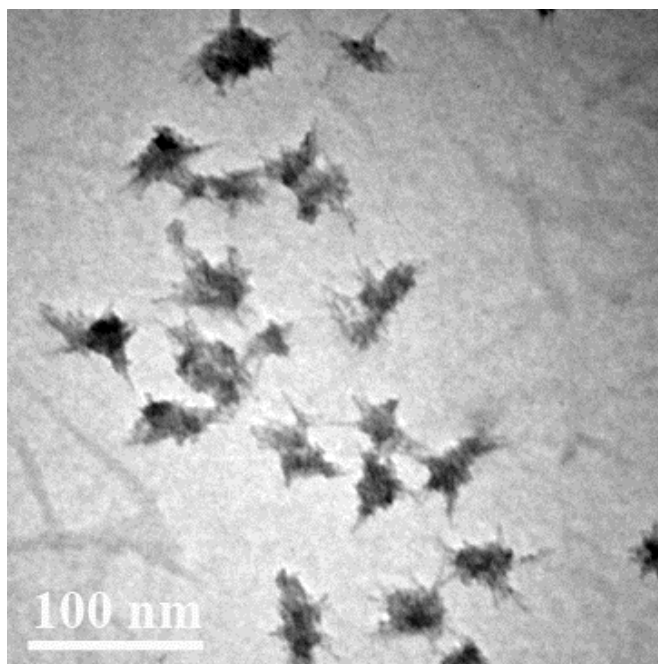

**Figure S1.** TEM image of CdSe NCs prepared from a control experiment using only Cd-BPA-Br precursors in the absence of Cd-BPA-P3HT.
